# Supplementary material for: Prognostic Value of Albumin to Globulin Ratio in Non-Metastatic and Metastatic Prostate Cancer Patients: A Meta-Analysis and Systematic Review
Source: MDPI journal article supplement (doi:10.3390/ijms231911501), 2022-09-29
Supplement: s1 [file s1]

# PROGNOSTIC VALUE OF ALBUMIN TO GLOBULIN RATIO IN NON-METASTATIC AND METASTATIC PROSTATE CANCER PATIENTS: A META-ANALYSIS AND SYSTEMATIC REVIEW

Stefano Salciccia <sup>a</sup>, Marco Frisenda <sup>a</sup>, Giulio Bevilacqua <sup>a</sup>, Pietro Viscuso <sup>a</sup>, Paolo Casale <sup>b</sup>, Ettore De Berardinis <sup>a</sup>, Giovanni Battista Di Pierro <sup>a</sup>, Susanna Cattarino <sup>a</sup>, Gloria Giorgino <sup>a</sup>, Davide Rosati <sup>a</sup>, Francesco Del Giudice <sup>a</sup>, Alessandro Sciarra <sup>a</sup>, Gianna Mariotti <sup>a</sup>, Alessandro Gentilucci <sup>a</sup>

## **Affiliations:**

<sup>a</sup> Department of Maternal-Infant and Urologic Sciences, 'Sapienza' University of Rome, Policlinico Umberto I Hospital, Rome, Italy.

<sup>b</sup> Department of Urology, Humanitas, Milan, Italy

*All authors listed gave a substantive contribution to this study and to this original article*

**Running title:** Meta-analysis on albumin to globulin ratio

**Words count:** 2293 (243 words Abstract); Tables: 1; Figures: 2; Supplementary Figures: 2; Supplementary Table :1

**Key words:** prostatic neoplasm, albumin to globulin ratio, meta-analysis, radical prostatectomy, hormone therapy

## **Corresponding Author:**

*Prof Alessandro Sciarra, MD*

Department of Maternal-Infant and Urologic Sciences, 'Sapienza' University of Rome. Policlinico Umberto I Hospital, Viale del Policlinico 151, Rome, 00161, Italy

Phone: +39-0649977000; Email: alessandro.sciarra@uniroma1.it
