# Supplementary material for: Prognostic Value of Albumin to Globulin Ratio in Non-Metastatic and Metastatic Prostate Cancer Patients: A Meta-Analysis and Systematic Review
Source: MDPI journal article supplement (doi:10.3390/ijms231911501), 2022-09-29
Supplement: s1 [file s1]

**Supplementary Table S1.** Risk of Bias for all studies included in the meta-analysis.

| RISK OF BIAS        |                   |             |                    |                 |
|---------------------|-------------------|-------------|--------------------|-----------------|
|                     | Patient selection | index tests | Reference standard | Flow and timing |
| Chung JM et al (20) | LOW               | UNCLEAR     | LOW                | LOW             |
| Qahal F et al (21)  | LOW               | LOW         | UNCLEAR            | LOW             |
| Aydh A et al (19)   | LOW               | LOW         | UNLCEAR            | LOW             |
| Wang et al (18)     | LOW               | LOW         | LOW                | UNCLEAR         |
