# Supplementary figures and images for: Prognostic Value of Albumin to Globulin Ratio in Non-Metastatic and Metastatic Prostate Cancer Patients: A Meta-Analysis and Systematic Review
Source: MDPI journal article supplement (doi:10.3390/ijms231911501), 2022-09-29

Galbraith plot

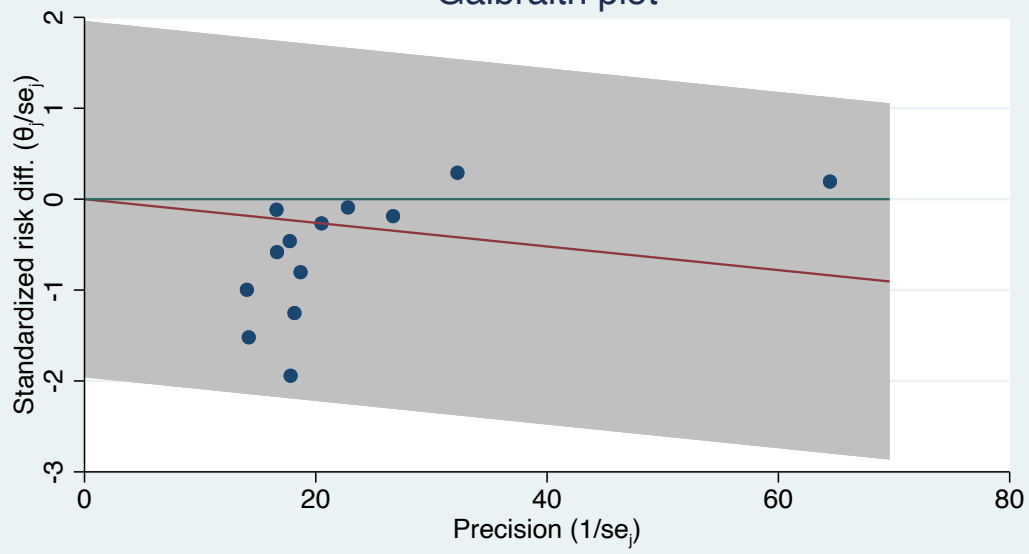

se<sub>i</sub>: estimated  $\sqrt{(\sigma_i^2 + \tau_{REML}^2)}$

|                 |           |
|-----------------|-----------|
| 95% CI          | Studies   |
| Regression line | No effect |

Supplement: s1 [file s1]

Funnel plot

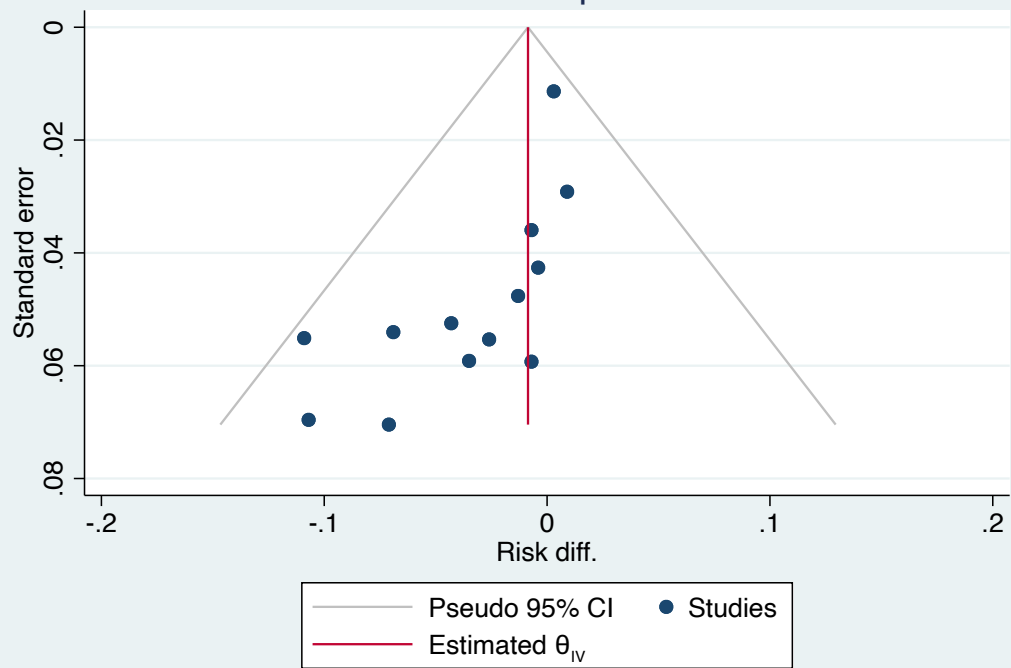

Supplement: s1 [file s1]
